# Supplementary material for: Genetic Dissection of Cardiac Remodeling in an Isoproterenol-Induced Heart Failure Mouse Model
Source: PubMed Central journal article supplement (PMC4934852; doi:10.1371/journal.pgen.1006038), 2016-07-06
Supplement: pgen.1006038.s002.pdf [file pgen.1006038.s002.pdf]

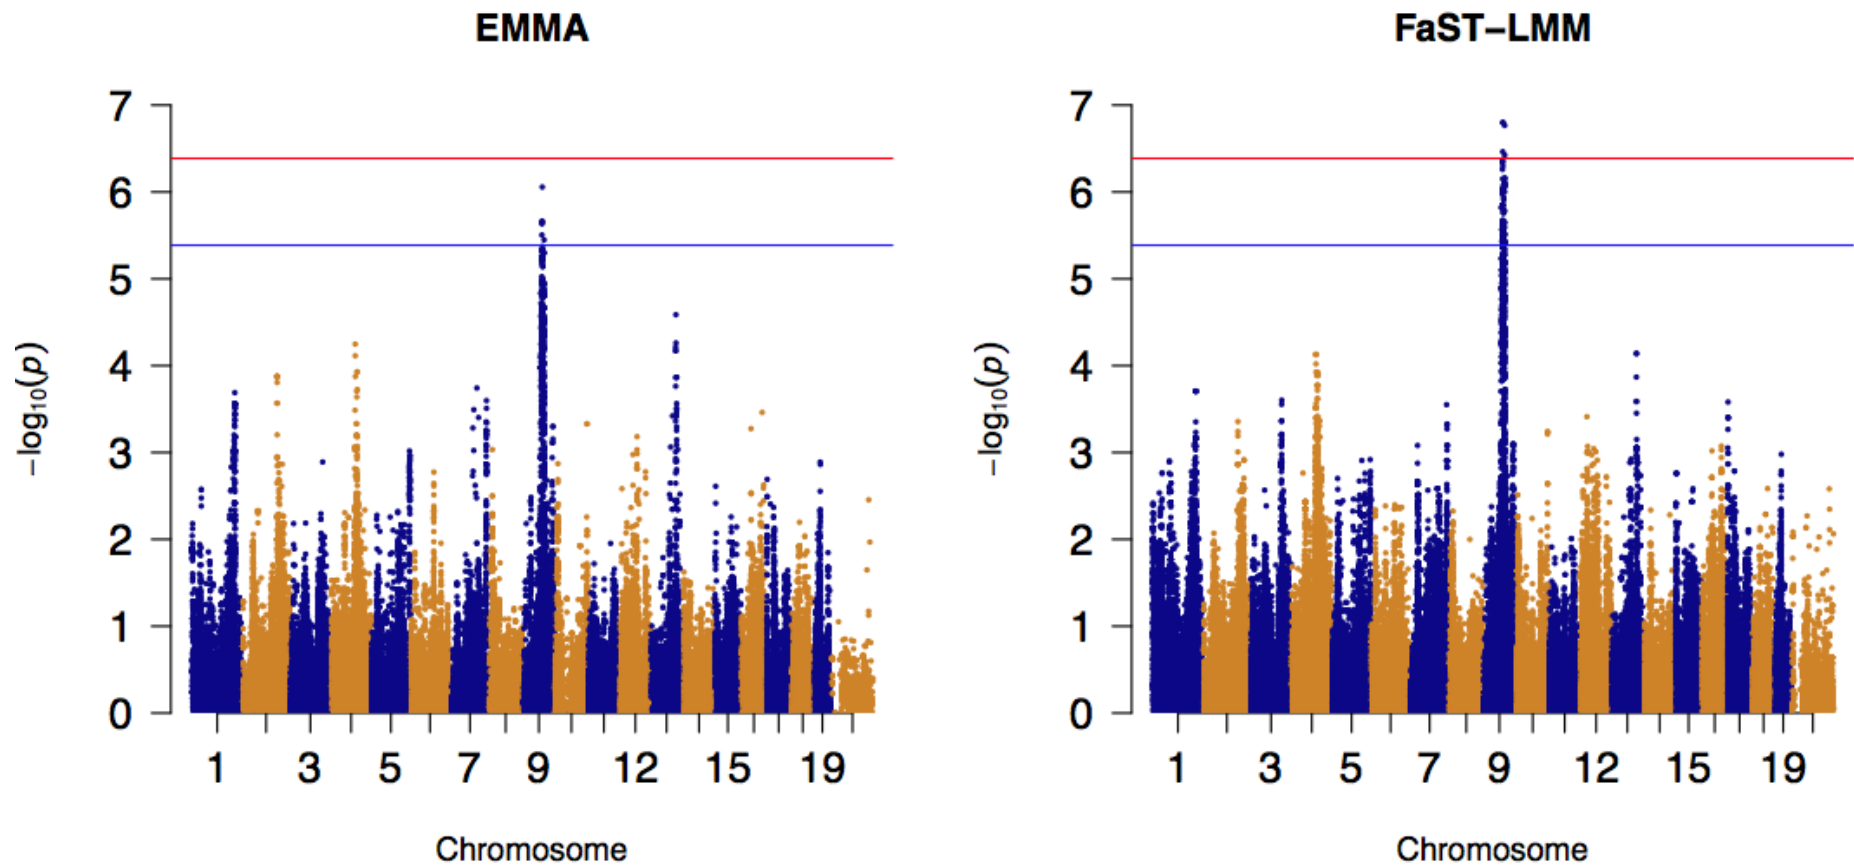

**S2 Fig. Association results from EMMA and FaST-LMM**

The manhattan plots for the change in week 1 IVSd show that association p-values by EMMA and FaST-LMM analyses were similar.
