# Supplementary material for: Genetic Dissection of Cardiac Remodeling in an Isoproterenol-Induced Heart Failure Mouse Model
Source: PubMed Central journal article supplement (PMC4934852; doi:10.1371/journal.pgen.1006038), 2016-07-06
Supplement: pgen.1006038.s003.pdf [file pgen.1006038.s003.pdf]

### A. Control

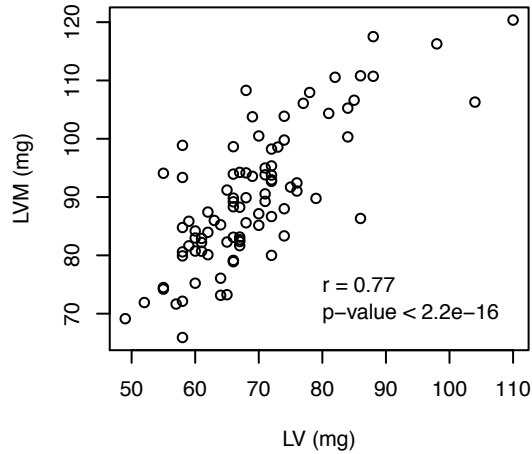

### B. Isoproterenol

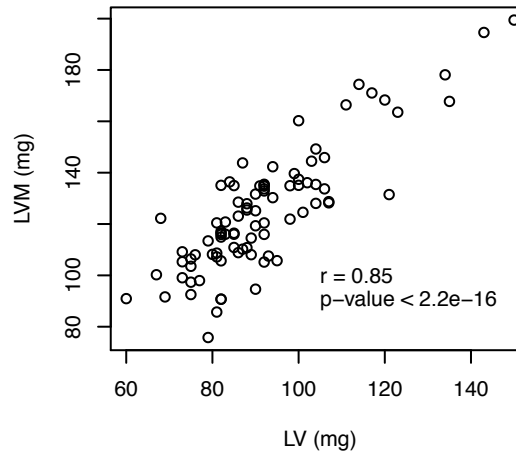

### C. Hypertrophy

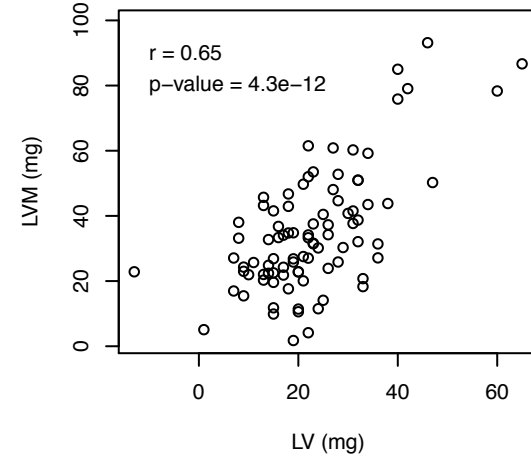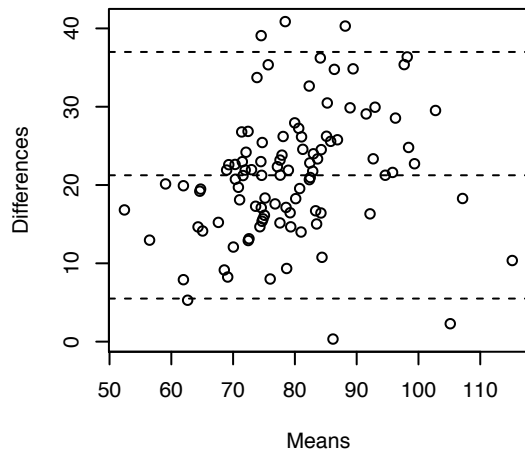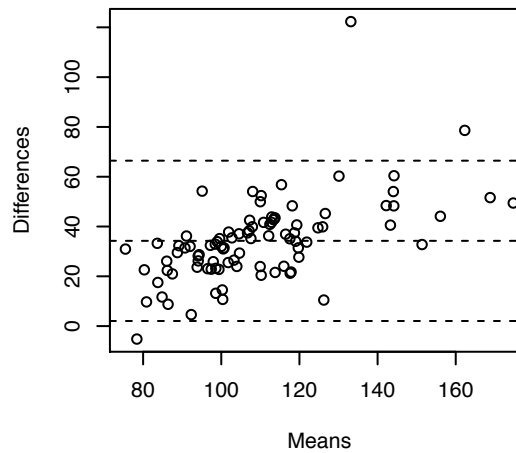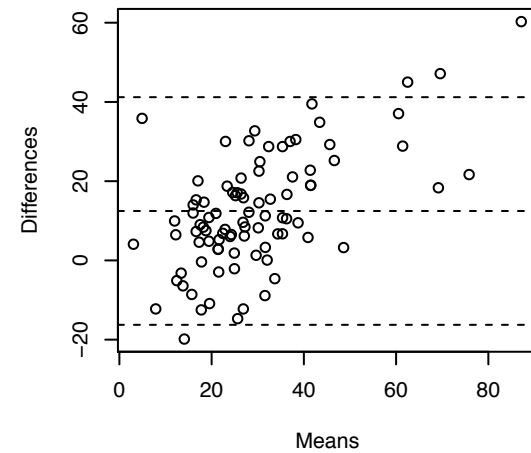

### S3 Fig. Left ventricular weight and echocardiographic estimates of left ventricular mass were significantly and highly correlated

(A) LVM at baseline versus control LV. (B) LVM versus LV after ISO for 3 weeks. (C) The change in LVM from baseline to week 3 of ISO versus the difference in the strain-averaged LV weights between control and ISO. Bland-Altman plots (bottom row) showing the agreement between LV and LVM are provided below. Each data point represents a mouse strain.

D

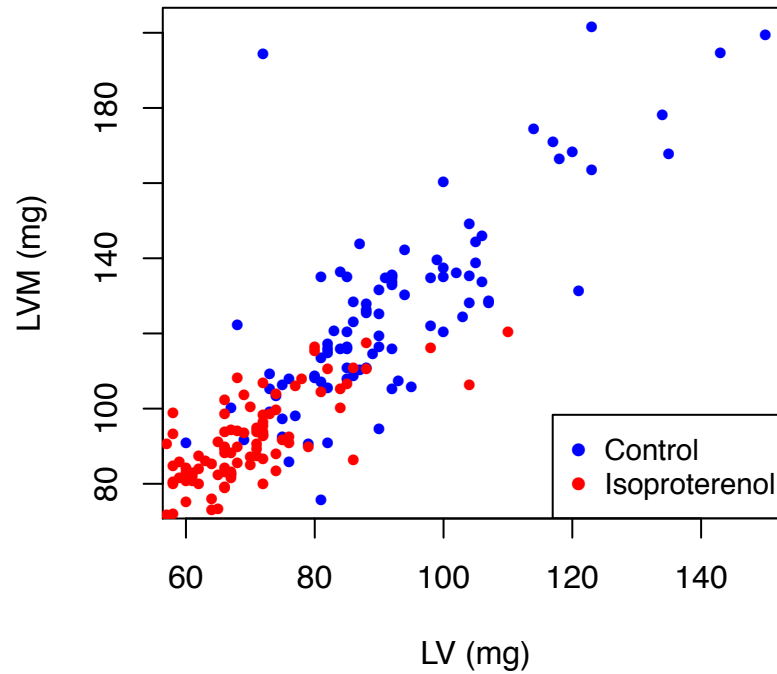

**S3 Fig. Left ventricular weight and echocardiographic estimates of left ventricular mass were significantly and highly correlated**

(D) Comparison of LV and LVM phenotypic spectra between control and isoproterenol hearts at week 3.
