# Supplementary material for: Genetic Dissection of Cardiac Remodeling in an Isoproterenol-Induced Heart Failure Mouse Model
Source: PubMed Central journal article supplement (PMC4934852; doi:10.1371/journal.pgen.1006038), 2016-07-06
Supplement: pgen.1006038.s004.pdf [file pgen.1006038.s004.pdf]

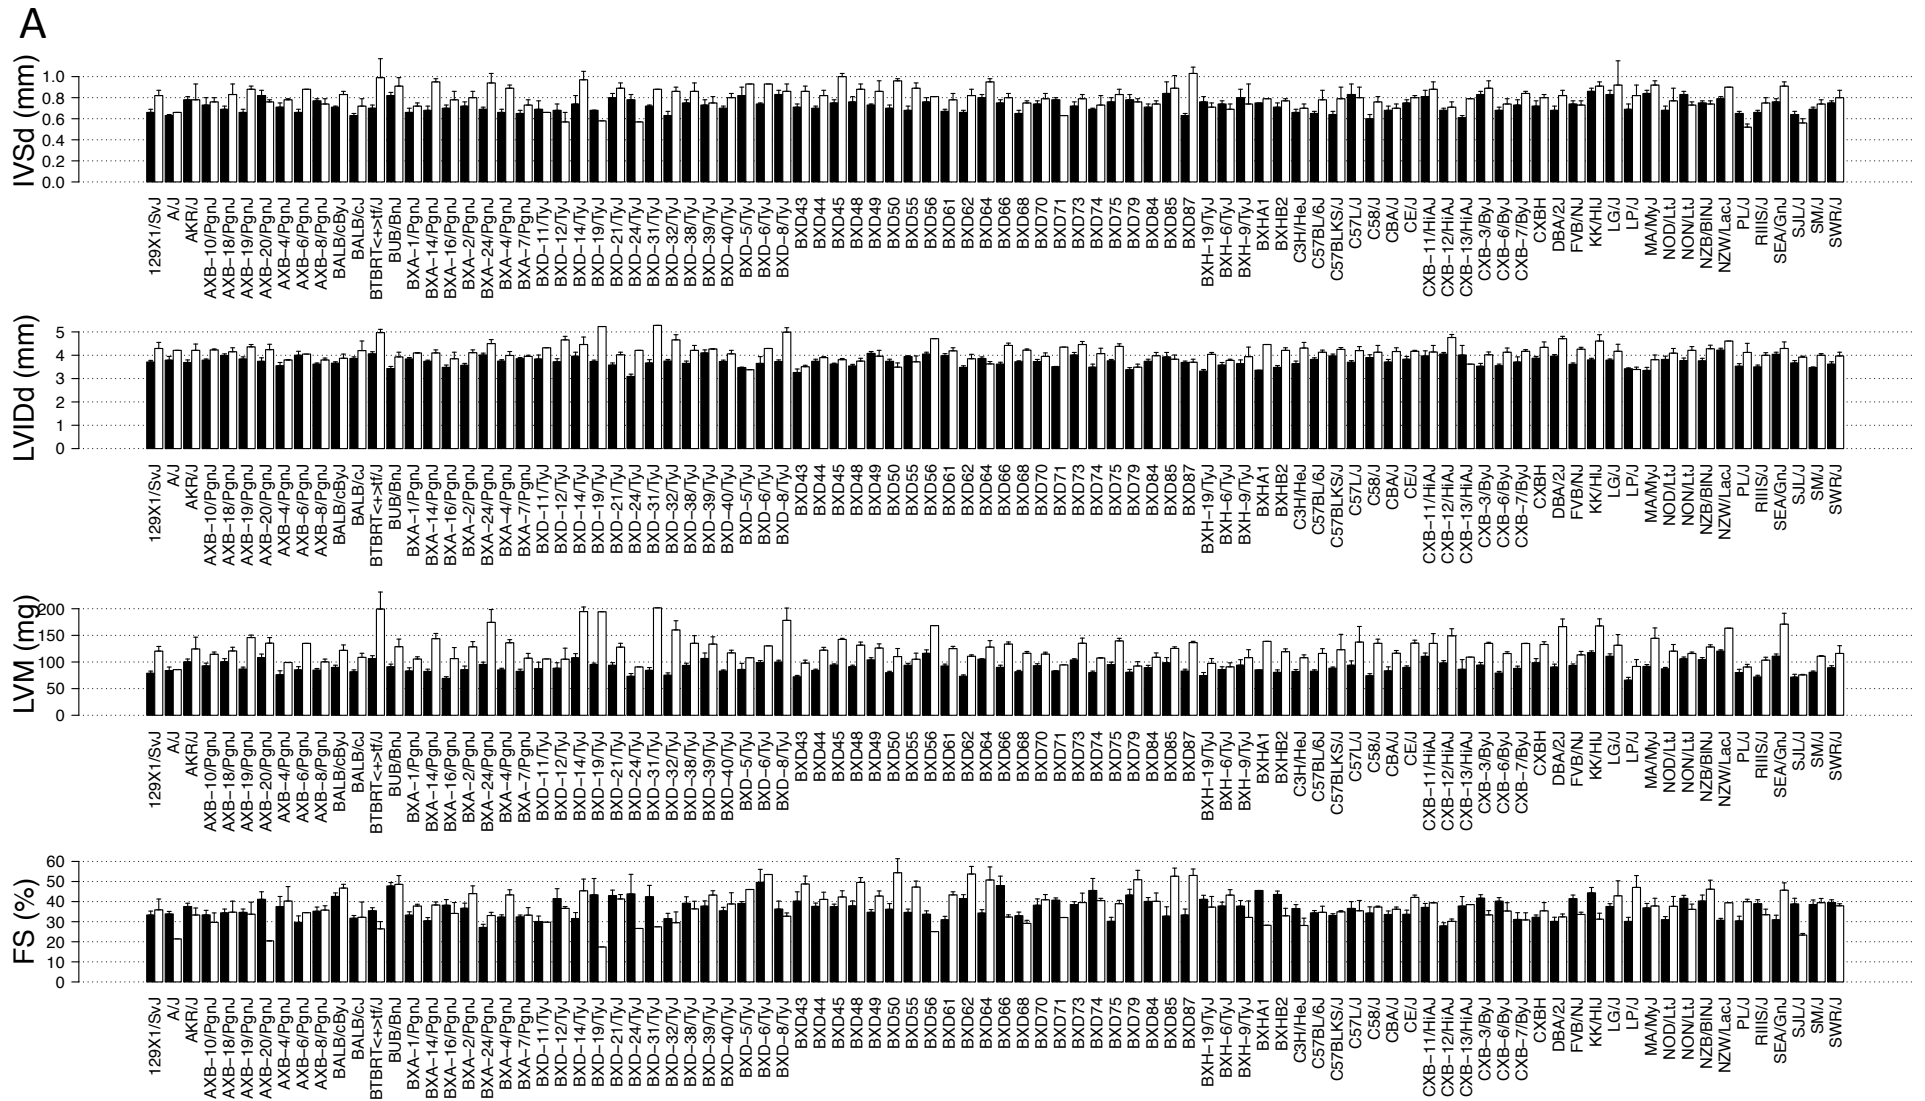

**S4 Fig. Variation in the echocardiographic measures of cardiac structure and function among mouse strains.** (A) Black bars represent measurements under the baseline condition. White bars represent measurements after 3 weeks of continuous ISO infusion. Data presented in alphabetical order of strain names. Error bars represent the standard errors of the means.

B

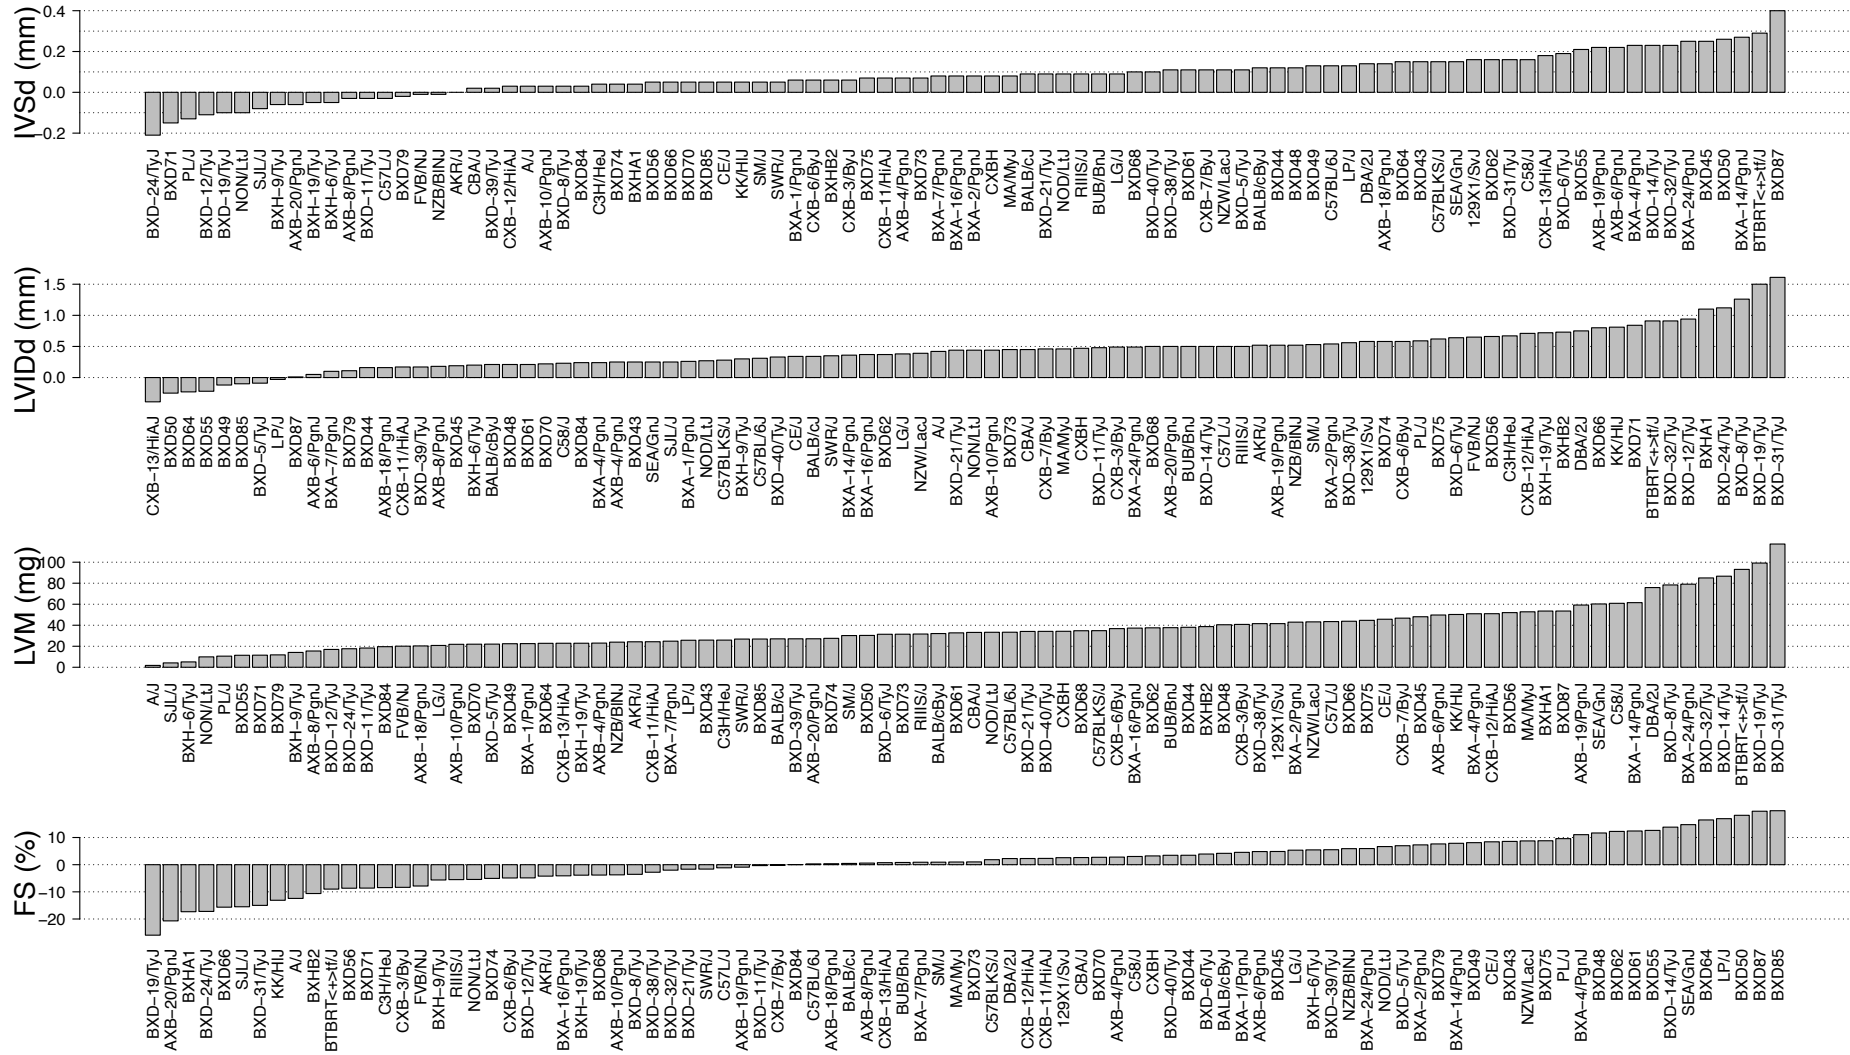

**S4 Fig. Variation in the echocardiographic measures of cardiac structure and function among mouse strains. (B)** Gray bars represent the differences in measurements between baseline and week 3 of continuous ISO infusion in ranked order.
