# Supplementary material for: Genetic Dissection of Cardiac Remodeling in an Isoproterenol-Induced Heart Failure Mouse Model
Source: PubMed Central journal article supplement (PMC4934852; doi:10.1371/journal.pgen.1006038), 2016-07-06
Supplement: pgen.1006038.s006.pdf [file pgen.1006038.s006.pdf]

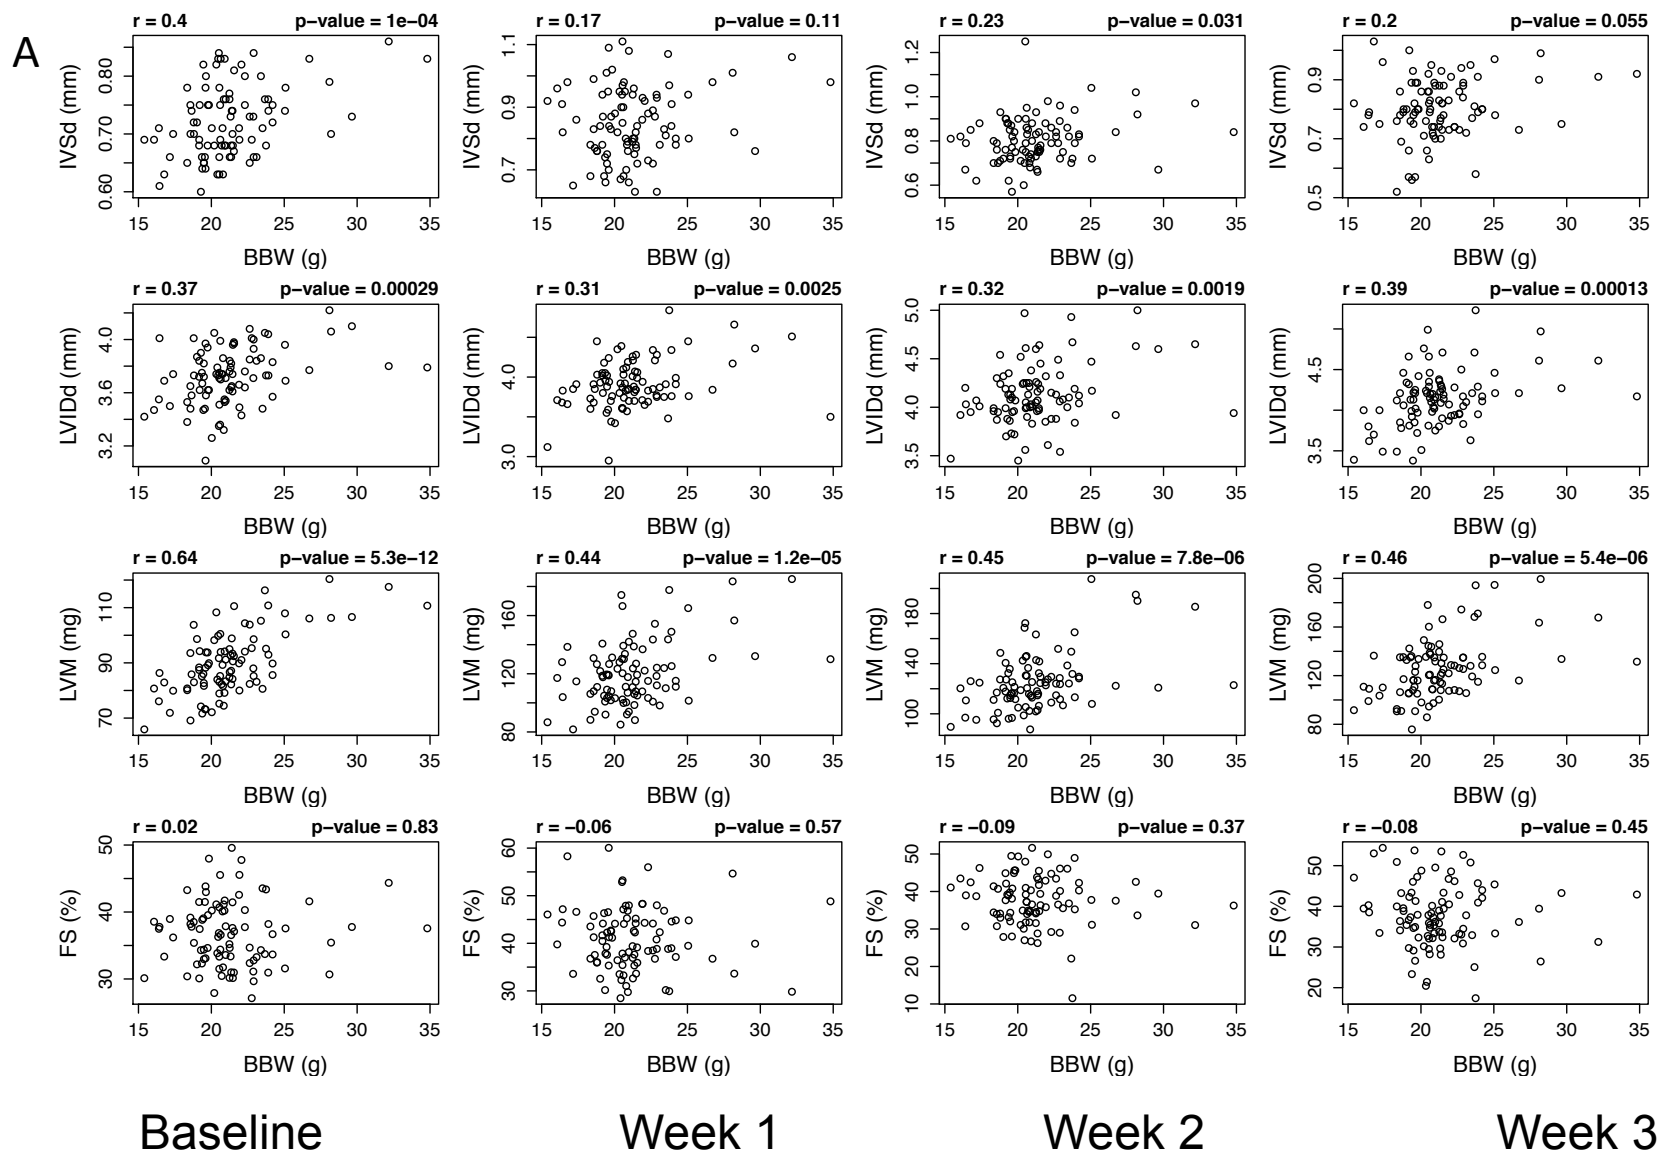

**S6 Fig. Relationships between baseline body weight, heart rate and echocardiographic measures**

(A) Relationships between echocardiographic measures and baseline body weight. BBW represents baseline body weight. Each data point represents a mouse strain.

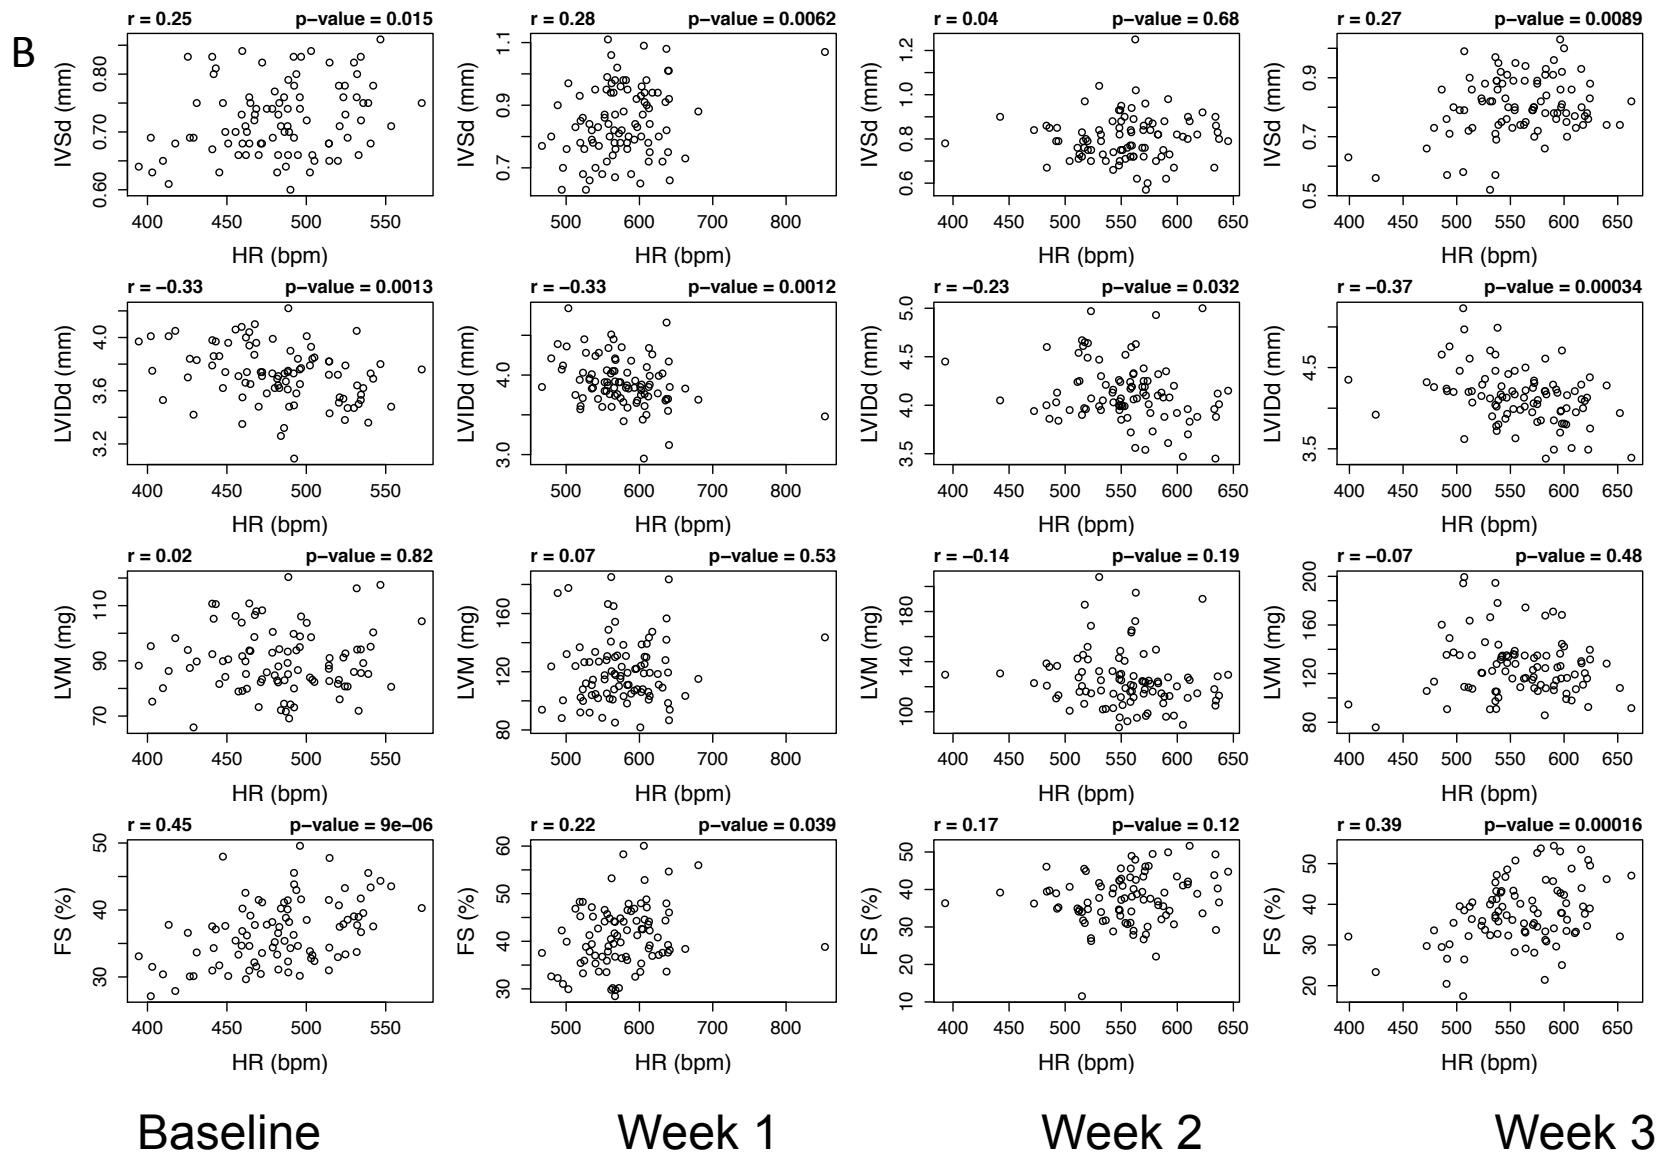

**S6 Fig. Relationships between baseline body weight, heart rate and echocardiographic measures**

(B) Relationships between echocardiographic measures and heart rate at corresponding time points. HR represents heart rate. Each data point represents a mouse strain.

**C**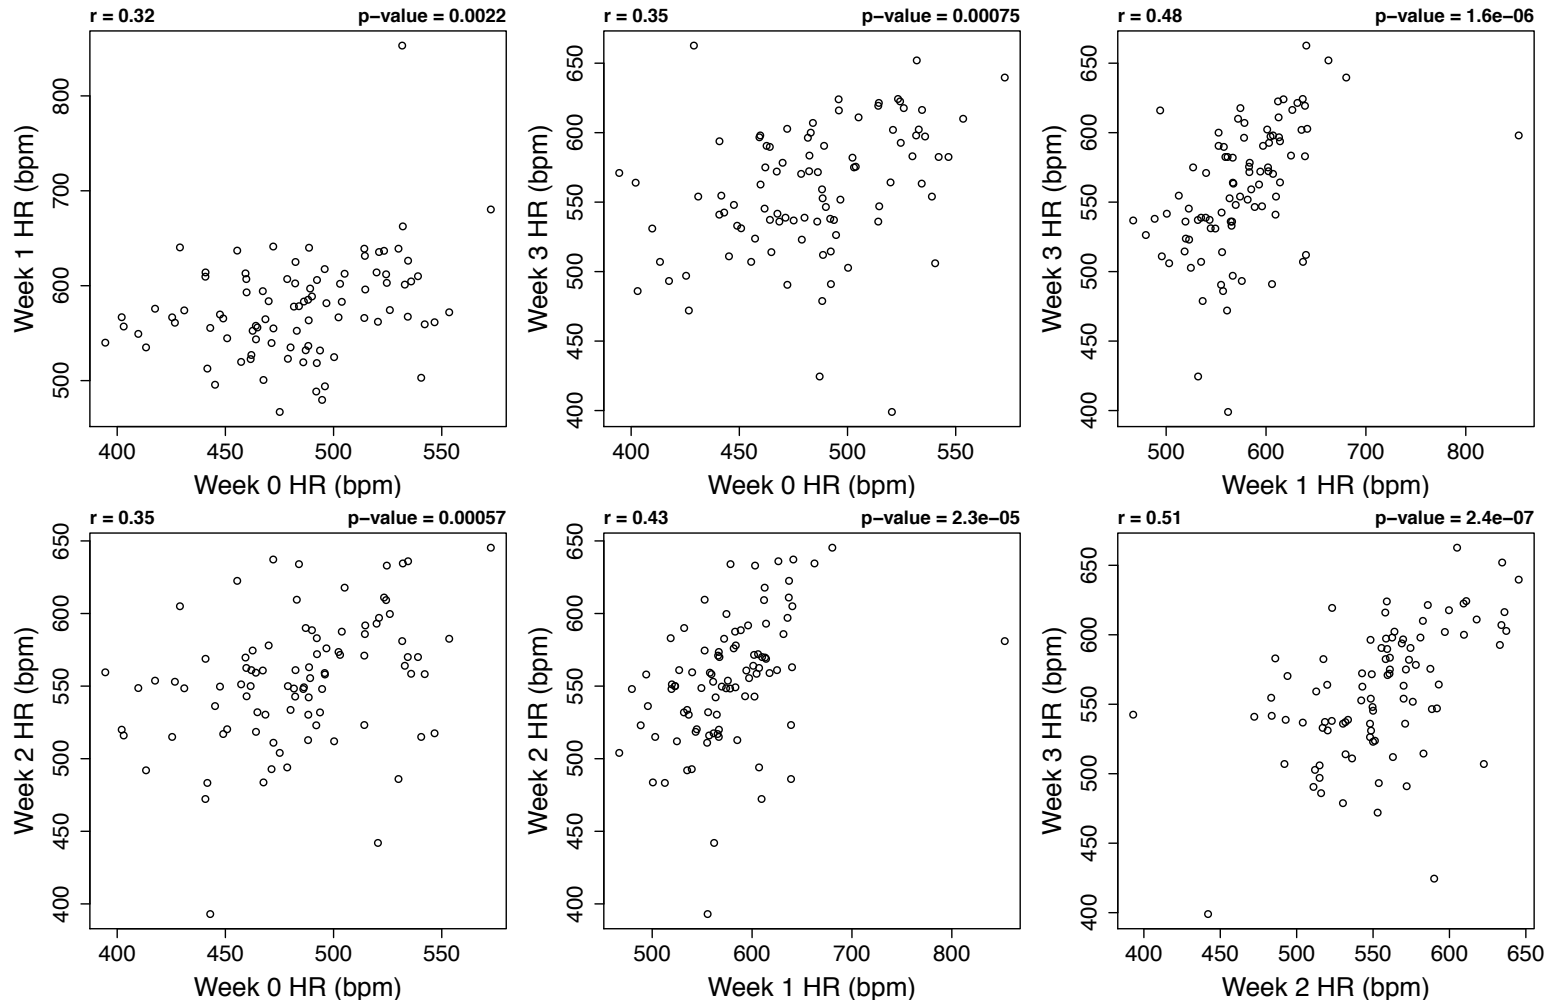

### S6 Fig. Relationships between baseline body weight, heart rate and echocardiographic measures

(C) Relationships between heart rates across time points. HR represents heart rate. Each data point represents a mouse strain.
