# Supplementary material for: Genetic Dissection of Cardiac Remodeling in an Isoproterenol-Induced Heart Failure Mouse Model
Source: PubMed Central journal article supplement (PMC4934852; doi:10.1371/journal.pgen.1006038), 2016-07-06
Supplement: pgen.1006038.s008.pdf [file pgen.1006038.s008.pdf]

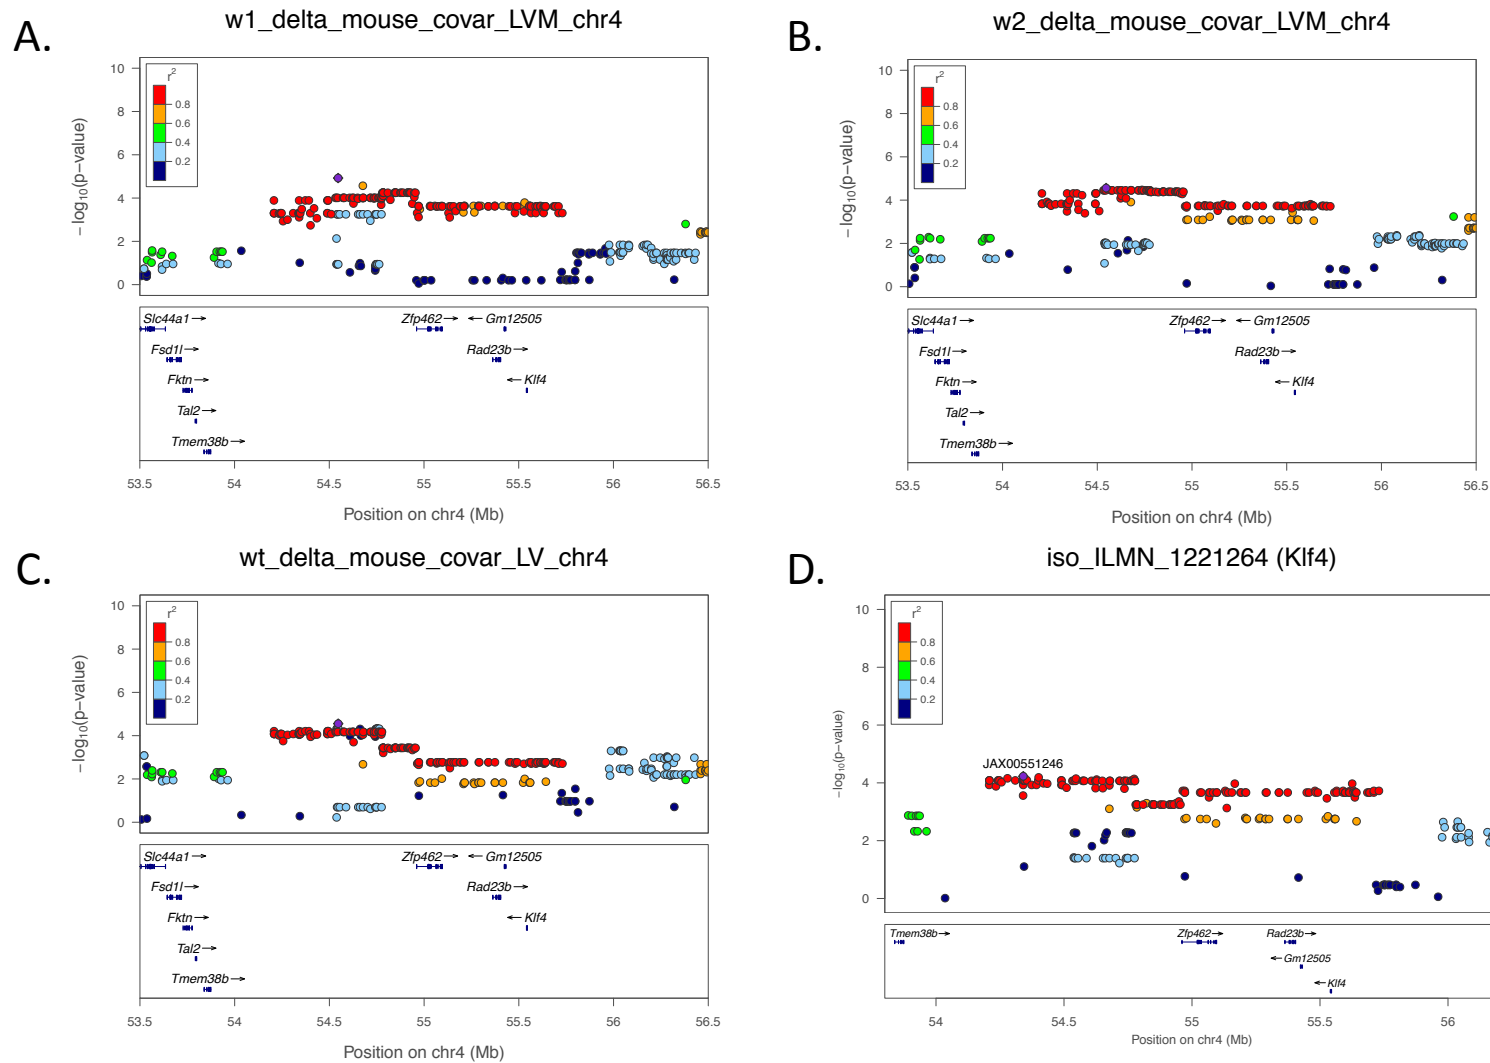

**S8 Fig. Fine mapping of LVM at chromosome 4 across time points**

A. Regional plot for LVM hypertrophy at week 1. B. Regional plot for LVM hypertrophy at week 2. C. Regional plot for ISO-treated LV hypertrophy at week 3. D. Regional plot for the ISO-treated *Klf4* expression (ILMN\_1221264) around SNP rs27794497 (purple).
