# Supplementary material for: Genetic Dissection of Cardiac Remodeling in an Isoproterenol-Induced Heart Failure Mouse Model
Source: PubMed Central journal article supplement (PMC4934852; doi:10.1371/journal.pgen.1006038), 2016-07-06
Supplement: pgen.1006038.s011.pdf [file pgen.1006038.s011.pdf]

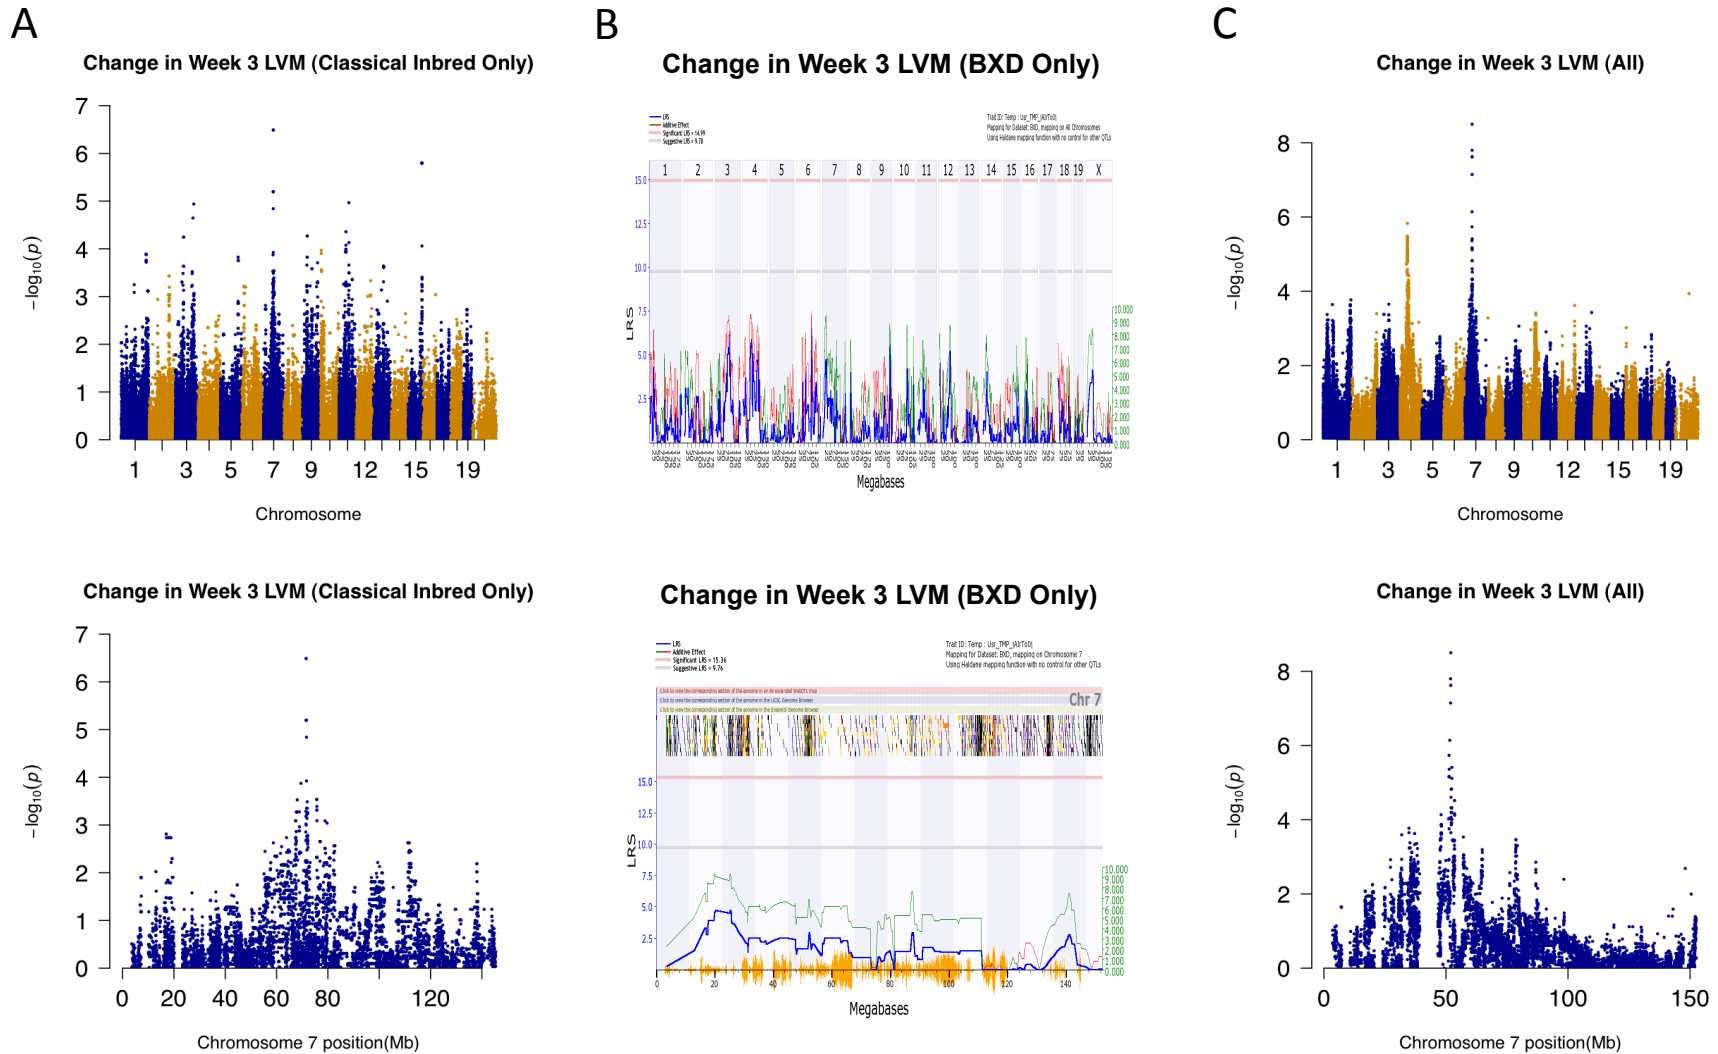

**S11 Fig. Comparative analysis of classical inbred, BXD, and all HMDP strains**

The genomewide and chromosome 7 manhattan plots for the change in week 3 LVM analyzed using the classical inbred strains only (A) and all of the HMDP strains (C). The genomewide and chromosome 7 linkage maps for the change in week 3 LVM analyzed using the BXD recombinant inbred strains only (B).
