# Supplementary material for: Genetic Dissection of Cardiac Remodeling in an Isoproterenol-Induced Heart Failure Mouse Model
Source: PubMed Central journal article supplement (PMC4934852; doi:10.1371/journal.pgen.1006038), 2016-07-06
Supplement: pgen.1006038.s012.pdf [file pgen.1006038.s012.pdf]

**S1 Table. The reproducibility of echocardiographic measures in control mice.**

|            | Baseline | Week 3 | p-value |
|------------|----------|--------|---------|
| IVSd (mm)  | 0.73     | 0.75   | 0.725   |
| LVIDd (mm) | 3.75     | 3.68   | 0.019   |
| LVM (mg)   | 92.3     | 93.5   | 0.345   |
| FS (%)     | 36.5     | 38.8   | 0.002   |

Echocardiograms in control mice from 70 strains were performed at baseline and at week 3 time points. The mean values at each time point were compared using a paired t-test.
