# Supplementary material for: Genetic Dissection of Cardiac Remodeling in an Isoproterenol-Induced Heart Failure Mouse Model
Source: PubMed Central journal article supplement (PMC4934852; doi:10.1371/journal.pgen.1006038), 2016-07-06
Supplement: pgen.1006038.s014.pdf [file pgen.1006038.s014.pdf]

**S3 Table. The number of births by gender and genotypes in *Myh14*<sup>+/-</sup> crosses.**

| Sex    | HET | KO | WT |
|--------|-----|----|----|
| Female | 49  | 23 | 23 |
| Male   | 33  | 23 | 18 |

Chi-Square test p = 0.13
