# Supplementary material for: Genetic Dissection of Cardiac Remodeling in an Isoproterenol-Induced Heart Failure Mouse Model
Source: PubMed Central journal article supplement (PMC4934852; doi:10.1371/journal.pgen.1006038), 2016-07-06
Supplement: pgen.1006038.s015.pdf [file pgen.1006038.s015.pdf]

**S4 Table. Study sample characteristics of the HMDP across isoproterenol treatment time points.**

|            | Baseline    | Week 1       | Week 2       | Week 3       |
|------------|-------------|--------------|--------------|--------------|
| IVSd (mm)  | 0.72 ± 0.06 | 0.85 ± 0.11  | 0.80 ± 0.10  | 0.80 ± 0.10  |
| LVIDd (mm) | 3.72 ± 0.21 | 3.91 ± 0.30  | 4.13 ± 0.30  | 4.14 ± 0.34  |
| LVM (mg)   | 89.9 ± 11.4 | 120.2 ± 21.8 | 124.9 ± 22.7 | 125.8 ± 24.4 |
| FS (%)     | 36.7 ± 4.8  | 40.9 ± 6.5   | 37.5 ± 6.7   | 37.7 ± 7.7   |

The population mean ± standard deviation of the 91 strains for which we have complete data across all time points are represented above.
