# Supplementary material for: Genetic Dissection of Cardiac Remodeling in an Isoproterenol-Induced Heart Failure Mouse Model
Source: PubMed Central journal article supplement (PMC4934852; doi:10.1371/journal.pgen.1006038), 2016-07-06
Supplement: pgen.1006038.s019.pdf [file pgen.1006038.s019.pdf]

**S8 Table. Human and mouse cardiovascular GWAS overlap genes.**

The association loci were compared to cardiovascular GWAS loci in humans to identify genes in the overlapping regions.

| mouse   | chr | start     | end       | analyses                  | human   | trait                         | author         | rsID                     |
|---------|-----|-----------|-----------|---------------------------|---------|-------------------------------|----------------|--------------------------|
| Tusc1   | 4   | 93000839  | 93002202  | wt_delta_mouse_covar_RV   | TUSC1   | RR interval (heart rate)      | Marroni F      | rs12552736<br>rs13300284 |
| Fam46a  | 9   | 85214046  | 85220731  | w1_delta_mouse_covar_IVSd | FAM46A  | Blood pressure                | Franceschini N | rs6924906                |
| Clstn2  | 9   | 97344814  | 97933600  | wt_delta_mouse_covar_RV   | CLSTN2  | Sudden cardiac arrest         | Aouizerat BE   | rs11708189               |
| Crhr1   | 11  | 103994169 | 104036837 | wt_delta_mouse_covar_RV   | CRHR1   | Idiopathic pulmonary fibrosis | Noth I         | rs17690703               |
| Lrp12   | 15  | 39702149  | 39775540  | w1_echo_mouse_covar_FS    | LRP12   | Sudden cardiac arrest         | Aouizerat BE   | rs16872085               |
| Zfpm2   | 15  | 40486588  | 40936138  | w1_echo_mouse_covar_FS    | ZFPM2   | Sudden cardiac arrest         | Aouizerat BE   | rs16872085               |
| Slc8a1  | 17  | 81785359  | 82048947  | wt_iso_mouse_covar_RV     | SLC8A1  | QT interval                   | Kim JW         | rs13017846               |
| Col17a1 | 19  | 47720834  | 47766584  | wt_delta_mouse_covar_RV   | COL17A1 | Cardiac hypertrophy           | Parsa A        | rs1320448                |
