# Supplementary material for: Genetic Dissection of Cardiac Remodeling in an Isoproterenol-Induced Heart Failure Mouse Model
Source: PubMed Central journal article supplement (PMC4934852; doi:10.1371/journal.pgen.1006038), 2016-07-06
Supplement: pgen.1006038.s020.pdf [file pgen.1006038.s020.pdf]

**S9 Table. *Myh14* cis-eQTL across multiples tissues in different HMDP datasets.**

| Dataset           | ProbesetID    | pvalue   | OR   |
|-------------------|---------------|----------|------|
| AthAoFemale       | 1428835_PM_at | 0.006    | 0.91 |
| AthLiverFemale    | 1428835_PM_at | 0.0002   | 0.89 |
| ChowAdipose       | 1428835_at    | 0.004    | 1.13 |
| ChowAorta         | 1428835_PM_at | 0.006    | 1.16 |
| ChowBone          | ILMN_1217519  | 0.03     | 1.01 |
| ChowHeart*        | 1428835_at    | 0.0005   | 1.35 |
| ChowLiver         | 1428835_at    | 6.12E-06 | 1.19 |
| HFA adiposeFemale | 1428835_at    | 0.0004   | 1.22 |
| HFA adiposeMale   | 1428835_at    | 0.004    | 1.18 |
| HFHypothalMale    | TSS82697      | 3.7E-09  | 0.79 |
| HFLiverFemale     | 1428835_at    | 2.99E-11 | 1.23 |
| HFLiverMale       | 1428835_at    | 2.08E-12 | 1.08 |

\* Associated SNP outside of the LD block of rs40560913
