# Supplementary material for: Genetic Dissection of Cardiac Remodeling in an Isoproterenol-Induced Heart Failure Mouse Model
Source: PubMed Central journal article supplement (PMC4934852; doi:10.1371/journal.pgen.1006038), 2016-07-06
Supplement: pgen.1006038.s021.pdf [file pgen.1006038.s021.pdf]

**S10 Table. *Myh14* correlation to heart weight in different HMDP datasets.**

| Trait               | Tissue         | bicor | pvalue   |
|---------------------|----------------|-------|----------|
| Heart/NMR_Mass_8wks | HFAiposeFemale | -0.27 | 9.31E-05 |
| Heart/NMR_Mass_8wks | HFLiverMale    | -0.19 | 0.003    |
| Heart/NMR_Mass_8wks | HFLiverFemale  | -0.15 | 0.033    |
