# Supplementary material for: Genetic Dissection of Cardiac Remodeling in an Isoproterenol-Induced Heart Failure Mouse Model
Source: PLOS journal article supplement (doi:10.1371/journal.pgen.1006038), 2016-07-06
Supplement: S9 (10.1371/journal.pgen.1006038.s009) [file journal.pgen.1006038.s009]

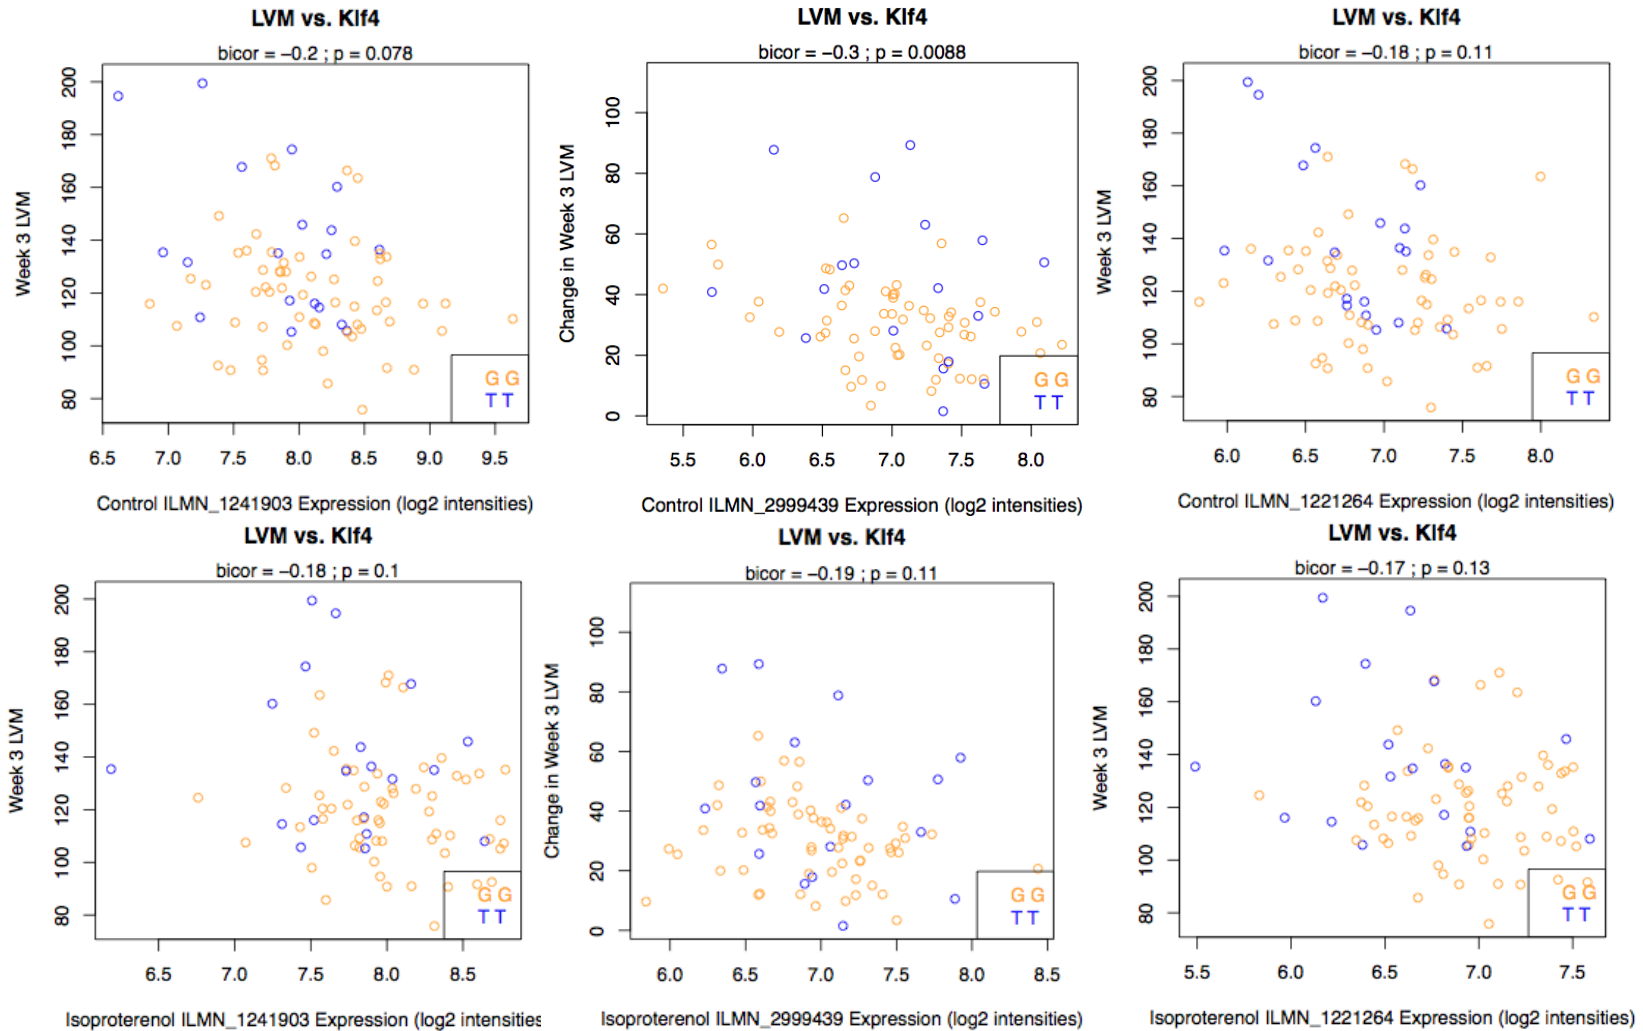

### S9 Fig. Correlation between *Kif4* transcript levels and week 3 LVM

Color circles represent SNP genotype at rs27811538. Bicor correlation and p-values are provided above. Pearson correlation between LVM and *Kif4* are as follows: Control ILMN\_1241903  $r = -0.28$  p-value = 0.01, ISO ILMN\_1241903  $r = -0.21$  p-value = 0.07; Control ILMN\_1221264  $r = -0.23$  p-value = 0.04, ISO ILMN\_1221264  $r = -0.21$  and p-value = 0.07.
